# Supplementary material for: Overexpression of Phosphate Transporter Gene CmPht1;2 Facilitated Pi Uptake and Alternated the Metabolic Profiles of Chrysanthemum Under Phosphate Deficiency
Source: Front Plant Sci. 2018 Jul 20;9:686. doi: 10.3389/fpls.2018.00686 (PMC6062769; doi:10.3389/fpls.2018.00686)
Supplement: TABLE S2 — Selected metabolites identified by GC-MS in roots of Oe1 under LP-treated conditions compared with WT. [file Table_2.XLSX]

## Sheet: Sheet1
Supplemental Table S2 Selected metabolites identified by GC-MS in roots of Oe1 under LP-treated conditions compared with WT.
Metabolites (Root)a	0d	2d	7d
	Oe1/WT	Oe1/WT	Oe1/WT
1,2,4-Benzenetriol	-	-	1.27772
10-Hydroxydecanoic acid	-	-	0.520902
11-beta-prostaglandin-F-2-alpha	-	-	0.638884
1-Hydroxy-2-naphthoic acid	-	0.707792	1.6264e-05
1-Hydroxyanthraquinone	-	0.875785	-
1-Methylhydantoin	-	-	1.30848
2,3-Dimethylsuccinic acid	1.32233	-	-
2,4-diaminobutyric acid	-	-	1.31975
2,6-Diaminopimelic acid	-	0.613549	-
21-hydroxypregnenolone	-	-	1.29951
2-Amino-3-methoxybenzoic acid	-	0.848921	1.33433
2-aminoethanethiol	-	-	1.27402
2-hydroxy-3-isopropylbutanedioic acid	-	-	0.598497
2-hydroxybutanoic acid	-	0.747272	-
2-keto-isovaleric acid	-	0.564832	-
2-mercaptoethanesulfonic acid	-	-	1.31311
2-Methylglutaric Acid	-	-	1.38978
3-hydroxybenzoic acid	-	-	1.25782
3-hydroxybutyric acid	-	-	3.55242
3-Hydroxypropionic acid	-	-	0.653194
3-Hydroxypyridine	-	-	1.21251
3-Methylamino-1,2-propanediol	-	0.810002	1.33696
3-Phenyllactic acid	-	0.257643	-
3-phosphoglycerate	-	-	1.24866e-05
4-aminobutyric acid	-	-	0.810056
4-Methyl-5-thiazolethanol	-	-	1.31322
4-methylumbelliferone	-	7.65178e-06	-
4-nitrocatechol	-	274387	-
4-Vinylphenol dimer	-	-	960052
5-Aminovaleric acid	-	-	1.33081
5-aminovaleric acid lactam	-	-	0.00127429
5-Hydroxyindole-2-carboxylic acid	-	-	1.24669
6-deoxy-D-glucose	-	0.469461	0.863073
6-hydroxy caproic acid trimer	-	-	1.26819
acetanilide	-	-	1.23231
Aconitic Acid	-	0.817187	-
Adenosine 5-monophosphate	-	0.633544	-
Alizarin	-	-	410710
Allo-inositol	-	-	0.859824
alpha-Ecdysone	-	-	1.47317
alpha-ketoglutaric acid	0.819014	-	-
Aminooxyacetic acid	0.768218	-	1.46415
Androstanediol	-	-	0.663185
Benzyl thiocyanate	-	0.814964	-
beta-Alanine	-	0.620484	-
beta-Hydroxymyristic acid	1.31702	-	-
beta-Mannosylglycerate	-	1.28008	0.579752
Bis(2-hydroxypropyl)amine	-	0.715465	-
Biuret	-	-	1.88543
butyraldehyde	-	0.256183	-
Carnitine	-	-	1.4048
Carvone	-	0.819883	1.32998
catechol	-	-	1.34585
cellobiose	-	0.593625	-
Cetadiol	-	0.7635	-
cis-1,2-Dihydronaphthalene-1,2-diol	-	1.31976	-
cis-gondoic acid	0.551781	0.545335	-
Citramalic acid	-	0.90013	-
citric acid	-	0.645559	-
creatine degr	-	0.833931	1.32654
Cumic Acid	-	-	1.38801
Cysteinylglycine	-	0.390783	-
Dehydroabietic Acid	-	-	1.27508
Dehydroshikimic acid	1.39759	-	-
D-erythro-sphingosine	-	-	0.555178
D-Fructose 1,6-bisphosphate	-	-	0.507094
D-galacturonic acid	-	0.821268	-
d-Glucoheptose	1.21575	-	-
dibenzofuran	-	0.836879	-
Digalacturonic acid	-	-	0.661665
Ethanolamine	-	-	1.25492
farnesol	-	-	1.3371
fumaric acid	-	-	0.555288
Galactinol	-	1.5948	0.493046
Gentiobiose	-	0.509295	-
Glucoheptonic acid	-	1.77629	0.433334
gluconic acid	-	-	0.583867
glutamic acid	0.844916	-	-
glycolic acid	-	-	0.866088
heptadecanoic acid	-	9244.38	-
hydroquinone	-	-	1.30734
hydroxylamine	-	-	1.519
Indolelactate	-	-	1.33253
isocitric acid	-	0.821597	-
Isopropyl-beta-D-thiogalactopyranoside	-	1.42158	-
lactitol	-	0.573826	0.520783
Lactobionic Acid	1.54109	-	-
L-Malic acid	-	-	0.734596
Maleamate	-	-	0.761221
maleic acid	0.853366	-	-
MALONAMIDE	-	0.792107	-
malonic acid	-	0.663911	-
mannitol	-	-	0.811485
mannose	1.29337	-	1.34316
melibiose	-	-	0.668435
methionine	1.21435	-	-
N-Acetyltryptophan	0.850339	-	0.610307
N-alpha-Acetyl-L-ornithine	2.36457e-07	-	939200
N-Ethylglycine	-	0.849795	1.35224
Nicotianamine	-	0.383067	0.382051
nicotinamide	-	-	0.216523
Nicotinoylglycine	-	-	1.39211
N-Methyl-L-glutamic acid	65467.2	-	-
norvaline	-	-	1.25864
O-acetylserine	-	0.745922	-
O-methylthreonine	-	0.76391	-
O-Phosphorylethanolamine	1.2959	-	-
oxalic acid	-	-	1.33214
oxamic acid	-	0.890484	-
pantothenic acid	1.22197	-	0.756021
p-benzoquinone	-	0.846012	1.32155
Phenaceturic acid	-	-	2.01271
phenylacetaldehyde	-	0.768165	1.31699
phosphomycin	1.5428	0.630551	1.27196
Pipecolinic acid	-	0.695271	-
prunin degr. Prod.	-	-	6.58007e-05
putrescine	-	-	1.39001
Pyruvic acid	-	-	0.608903
ribose-5-phosphate	1.21112	-	-
saccharin	-	-	5.75378
salicin	-	0.692098	0.408668
salicylic acid	-	0.580548	0.427678
scopoletin	-	-	1.50272
shikimic acid	1.30776	-	-
Sinapyl alcohol	-	0.880695	-
Sophorose	-	1.93207	-
sorbitol	-	5.7659	-
spermidine	-	-	1.33156
succinic acid	-	1.22399	0.734672
sucrose	-	-	0.151572
Synephrine	-	-	1.45884
Tagatose	-	1.57787	-
TES	1.47063	-	-
thymidine 5'-monophosphate degr prod	1.89853	-	-
trans,trans-Muconic acid	-	-	5.31301e-06
trans-4-hydroxy-L-proline	-	-	1.35563
tryptophan	1.52251	-	-
tyrosine	-	-	1.31369
uridine	-	-	0.675977
urocanic acid	-	0.802564	1.33853
xylose	-	0.789241	0.792402
aMetabolites with VIP values larger than 1 and P values less than 0.05 were included, respectively. Up-regulate, FC>1.2, and down-regulate, FC<0.8.
