# Supplementary material for: Overexpression of Phosphate Transporter Gene CmPht1;2 Facilitated Pi Uptake and Alternated the Metabolic Profiles of Chrysanthemum Under Phosphate Deficiency
Source: Front Plant Sci. 2018 Jul 20;9:686. doi: 10.3389/fpls.2018.00686 (PMC6062769; doi:10.3389/fpls.2018.00686)
Supplement: TABLE S6 — Pathways involved in the roots of Oe1 under LP-treated conditions 2 days compared with WT identified by KEGG analysis. [file Table_6.XLSX]

## Sheet: 代谢通路富集表
Supplemental Table S6 Pathways involved in roots of Oe1 under LP-treated conditions 2 d compared with WT identified by KEGG analysis.
ID Annotation	Annotation	Category	Group	Database	set	in set	background	in background	p-value	-log(P-value)	FDR correction	Submitted IDs	Matching IDs
ath01061	Biosynthesis of phenylpropanoids	KEGG pathways	Pathways	KEGG (Arabidopsis thaliana (thale cress))	22	6	3358	97	2.55e-05	4.59346	0.000842	C00805 C02325 C00158 C01451 C00311 C00042	C00805 C02325 C00158 C01451 C00311 C00042	http://www.kegg.jp/kegg-bin/show_pathway?map=map01061&show_description=show
ath00020	Citrate cycle (TCA cycle)	KEGG pathways	Pathways	KEGG (Arabidopsis thaliana (thale cress))	22	3	3358	20	0.000259	3.5867	0.00427	C00158 C00311 C00042	C00158 C00311 C00042	http://www.genome.jp/kegg-bin/show_pathway?150751439092288/ath00020.args
ath01064	Biosynthesis of alkaloids derived from ornithine, lysine and nicotinic acid	KEGG pathways	Pathways	KEGG (Arabidopsis thaliana (thale cress))	22	4	3358	67	0.000808	3.09259	0.00705	C00408 C00158 C00311 C00042	C00408 C00158 C00311 C00042	http://www.kegg.jp/kegg-bin/show_pathway?map=map01064&show_description=show
ath01070	Biosynthesis of plant hormones	KEGG pathways	Pathways	KEGG (Arabidopsis thaliana (thale cress))	22	4	3358	68	0.000855	3.06803	0.00705	C00805 C00158 C00311 C00042	C00805 C00158 C00311 C00042	http://www.kegg.jp/kegg-bin/show_pathway?map=map01070&show_description=show
ath01065	Biosynthesis of alkaloids derived from histidine and purine	KEGG pathways	Pathways	KEGG (Arabidopsis thaliana (thale cress))	22	3	3358	35	0.0014	2.85387	0.00836	C00158 C00311 C00042	C00158 C00311 C00042	http://www.kegg.jp/kegg-bin/show_pathway?map=map01065&show_description=show
ath00640	Propanoate metabolism	KEGG pathways	Pathways	KEGG (Arabidopsis thaliana (thale cress))	22	3	3358	36	0.00152	2.81816	0.00836	C05984 C00042 C00099	C05984 C00042 C00099	http://www.genome.jp/kegg-bin/show_pathway?150751439092288/ath00640.args
ath00630	Glyoxylate and dicarboxylate metabolism	KEGG pathways	Pathways	KEGG (Arabidopsis thaliana (thale cress))	22	3	3358	44	0.00272	2.56543	0.0127	C00158 C00311 C00042	C00158 C00311 C00042	http://www.genome.jp/kegg-bin/show_pathway?150751439092288/ath00630.args
ath00360	Phenylalanine metabolism	KEGG pathways	Pathways	KEGG (Arabidopsis thaliana (thale cress))	22	3	3358	46	0.00309	2.51004	0.0127	C00805 C00601 C00042	C00805 C00601 C00042	http://www.genome.jp/kegg-bin/show_pathway?150751439092288/ath00360.args
ath01066	Biosynthesis of alkaloids derived from terpenoid and polyketide	KEGG pathways	Pathways	KEGG (Arabidopsis thaliana (thale cress))	22	3	3358	48	0.00349	2.45717	0.0128	C00158 C00311 C00042	C00158 C00311 C00042	http://www.kegg.jp/kegg-bin/show_pathway?map=map01066&show_description=show
ath00410	beta-Alanine metabolism	KEGG pathways	Pathways	KEGG (Arabidopsis thaliana (thale cress))	22	2	3358	31	0.017	1.76955	0.0561	C00099 C00383	C00099 C00383	http://www.genome.jp/kegg-bin/show_pathway?150751439092288/ath00410.args
ath01062	Biosynthesis of terpenoids and steroids	KEGG pathways	Pathways	KEGG (Arabidopsis thaliana (thale cress))	22	3	3358	98	0.0248	1.60555	0.0731	C00158 C00311 C00042	C00158 C00311 C00042	http://www.kegg.jp/kegg-bin/show_pathway?map=map01062&show_description=show
ath00650	Butanoate metabolism	KEGG pathways	Pathways	KEGG (Arabidopsis thaliana (thale cress))	22	2	3358	40	0.0275	1.56067	0.0731	C00042 C01412	C00042 C01412	http://www.genome.jp/kegg-bin/show_pathway?150751439092288/ath00650.args
ath00052	Galactose metabolism	KEGG pathways	Pathways	KEGG (Arabidopsis thaliana (thale cress))	22	2	3358	41	0.0288	1.54061	0.0731	C00794 C01235	C00794 C01235	http://www.genome.jp/kegg-bin/show_pathway?150751439092288/ath00052.args
ath00500	Starch and sucrose metabolism	KEGG pathways	Pathways	KEGG (Arabidopsis thaliana (thale cress))	22	2	3358	50	0.0415	1.38195	0.0966	C00333 C00185	C00333 C00185	http://www.genome.jp/kegg-bin/show_pathway?150751439092288/ath00500.args
ath01100	Metabolic pathways	KEGG pathways	Pathways	KEGG (Arabidopsis thaliana (thale cress))	22	14	3358	1455	0.0439	1.35754	0.0966	C00805 C00408 C03203 C02325 C00785 C00158 C00333 C07729 C04314 C00601 C00794 C00311 C00042 C00099	C00805 C00408 C03203 C02325 C00785 C00158 C00333 C07729 C04314 C00601 C00794 C00311 C00042 C00099	http://www.genome.jp/kegg-bin/show_pathway?150751439092288/ath01100.args
ath00240	Pyrimidine metabolism	KEGG pathways	Pathways	KEGG (Arabidopsis thaliana (thale cress))	22	2	3358	59	0.056	1.25181	0.115	C00099 C00383	C00099 C00383
ath01063	Biosynthesis of alkaloids derived from shikimate pathway	KEGG pathways	Pathways	KEGG (Arabidopsis thaliana (thale cress))	22	3	3358	138	0.0591	1.22841	0.115	C00158 C00311 C00042	C00158 C00311 C00042
ath00190	Oxidative phosphorylation	KEGG pathways	Pathways	KEGG (Arabidopsis thaliana (thale cress))	22	1	3358	16	0.1	1	0.183	C00042	C00042
ath00740	Riboflavin metabolism	KEGG pathways	Pathways	KEGG (Arabidopsis thaliana (thale cress))	22	1	3358	21	0.129	0.88941	0.224	C00472	C00472
ath00250	Alanine, aspartate and glutamate metabolism	KEGG pathways	Pathways	KEGG (Arabidopsis thaliana (thale cress))	22	1	3358	24	0.146	0.835647	0.241	C00042	C00042
ath00770	Pantothenate and CoA biosynthesis	KEGG pathways	Pathways	KEGG (Arabidopsis thaliana (thale cress))	22	1	3358	27	0.163	0.787812	0.256	C00099	C00099
ath00010	Glycolysis / Gluconeogenesis	KEGG pathways	Pathways	KEGG (Arabidopsis thaliana (thale cress))	22	1	3358	31	0.185	0.732828	0.277	C01451	C01451
ath00902	Monoterpenoid biosynthesis	KEGG pathways	Pathways	KEGG (Arabidopsis thaliana (thale cress))	22	1	3358	44	0.253	0.596879	0.332	C11383	C11383
ath00340	Histidine metabolism	KEGG pathways	Pathways	KEGG (Arabidopsis thaliana (thale cress))	22	1	3358	44	0.253	0.596879	0.332	C00785	C00785
ath00310	Lysine degradation	KEGG pathways	Pathways	KEGG (Arabidopsis thaliana (thale cress))	22	1	3358	47	0.267	0.573489	0.332	C00408	C00408
ath00053	Ascorbate and aldarate metabolism	KEGG pathways	Pathways	KEGG (Arabidopsis thaliana (thale cress))	22	1	3358	47	0.267	0.573489	0.332	C00333	C00333
ath00051	Fructose and mannose metabolism	KEGG pathways	Pathways	KEGG (Arabidopsis thaliana (thale cress))	22	1	3358	48	0.272	0.565431	0.332	C00794	C00794
ath00040	Pentose and glucuronate interconversions	KEGG pathways	Pathways	KEGG (Arabidopsis thaliana (thale cress))	22	1	3358	53	0.296	0.528708	0.347	C00333	C00333
ath00940	Phenylpropanoid biosynthesis	KEGG pathways	Pathways	KEGG (Arabidopsis thaliana (thale cress))	22	1	3358	55	0.305	0.5157	0.347	C02325	C02325
ath00903	Limonene and pinene degradation	KEGG pathways	Pathways	KEGG (Arabidopsis thaliana (thale cress))	22	1	3358	59	0.324	0.489455	0.356	C11383	C11383
ath00960	Tropane, piperidine and pyridine alkaloid biosynthesis	KEGG pathways	Pathways	KEGG (Arabidopsis thaliana (thale cress))	22	1	3358	68	0.363	0.440093	0.386	C00408	C00408
ath00350	Tyrosine metabolism	KEGG pathways	Pathways	KEGG (Arabidopsis thaliana (thale cress))	22	1	3358	76	0.397	0.401209	0.409	C00042	C00042
ath00520	Amino sugar and nucleotide sugar metabolism	KEGG pathways	Pathways	KEGG (Arabidopsis thaliana (thale cress))	22	1	3358	87	0.44	0.356547	0.44	C00333	C00333
