# Supplementary material for: Overexpression of Phosphate Transporter Gene CmPht1;2 Facilitated Pi Uptake and Alternated the Metabolic Profiles of Chrysanthemum Under Phosphate Deficiency
Source: Front Plant Sci. 2018 Jul 20;9:686. doi: 10.3389/fpls.2018.00686 (PMC6062769; doi:10.3389/fpls.2018.00686)
Supplement: TABLE S10 — Pathways involved in the shoots of Oe1 under LP-treated conditions 7 days compared with WT identified by KEGG analysis. [file Table_10.XLSX]

## Sheet: 代谢通路富集表（kegg)
Supplemental Table S10 Pathways involved in shoots of Oe1 under LP-treated conditions 7 d compared with WT identified by KEGG analysis.
ID Annotation	Annotation	Category	Group	Database	set	in set	background	in background	p-value	-log(p-value)	FDR correction	Submitted IDs	Matching IDs
ath00250	Alanine, aspartate and glutamate metabolism	KEGG pathways	Pathways	KEGG (Arabidopsis thaliana (thale cress))	15	2	3358	24	0.00486	2.31336	0.0828	C00334 C00025	C00334 C00025	http://www.genome.jp/kegg-bin/show_pathway?150578658598660/ath00250.args
ath00410	beta-Alanine metabolism	KEGG pathways	Pathways	KEGG (Arabidopsis thaliana (thale cress))	15	2	3358	31	0.00804	2.09474	0.0828	C00334 C01013	C00334 C01013	http://www.genome.jp/kegg-bin/show_pathway?150578658598660/ath00410.args
ath00650	Butanoate metabolism	KEGG pathways	Pathways	KEGG (Arabidopsis thaliana (thale cress))	15	2	3358	40	0.0132	1.87943	0.0828	C00334 C00025	C00334 C00025	http://www.genome.jp/kegg-bin/show_pathway?150578658598660/ath00650.args
ath00630	Glyoxylate and dicarboxylate metabolism	KEGG pathways	Pathways	KEGG (Arabidopsis thaliana (thale cress))	15	2	3358	44	0.0158	1.80134	0.0828	C00160 C00898	C00160 C00898	http://www.genome.jp/kegg-bin/show_pathway?150578658598660/ath00630.args
ath00360	Phenylalanine metabolism	KEGG pathways	Pathways	KEGG (Arabidopsis thaliana (thale cress))	15	2	3358	46	0.0172	1.76447	0.0828	C00156 C07086	C00156 C07086	http://www.genome.jp/kegg-bin/show_pathway?150578658598660/ath00360.args
ath01100	Metabolic pathways	KEGG pathways	Pathways	KEGG (Arabidopsis thaliana (thale cress))	15	11	3358	1455	0.0184	1.73518	0.0828	C00334 C00212 C00156 C00178 C00160 C05500 C06202 C07086 C00137 C01013 C00025	C00334 C00212 C00156 C00178 C00160 C05500 C06202 C07086 C00137 C01013 C00025	http://www.genome.jp/kegg-bin/show_pathway?150578658598660/ath01100.args
ath00330	Arginine and proline metabolism	KEGG pathways	Pathways	KEGG (Arabidopsis thaliana (thale cress))	15	2	3358	82	0.0504	1.29757	0.194	C00334 C00025	C00334 C00025
ath01061	Biosynthesis of phenylpropanoids	KEGG pathways	Pathways	KEGG (Arabidopsis thaliana (thale cress))	15	2	3358	97	0.0679	1.16813	0.229	C00156 C06202	C00156 C06202
ath00910	Nitrogen metabolism	KEGG pathways	Pathways	KEGG (Arabidopsis thaliana (thale cress))	15	1	3358	26	0.11	0.958607	0.265	C00025	C00025
ath04070	Phosphatidylinositol signaling system	KEGG pathways	Pathways	KEGG (Arabidopsis thaliana (thale cress))	15	1	3358	27	0.114	0.943095	0.265	C00137	C00137
ath00660	C5-Branched dibasic acid metabolism	KEGG pathways	Pathways	KEGG (Arabidopsis thaliana (thale cress))	15	1	3358	32	0.134	0.872895	0.265	C00025	C00025
ath00640	Propanoate metabolism	KEGG pathways	Pathways	KEGG (Arabidopsis thaliana (thale cress))	15	1	3358	36	0.15	0.823909	0.265	C01013	C01013
ath00480	Glutathione metabolism	KEGG pathways	Pathways	KEGG (Arabidopsis thaliana (thale cress))	15	1	3358	38	0.157	0.8041	0.265	C00025	C00025
ath00562	Inositol phosphate metabolism	KEGG pathways	Pathways	KEGG (Arabidopsis thaliana (thale cress))	15	1	3358	39	0.161	0.793174	0.265	C00137	C00137
ath00052	Galactose metabolism	KEGG pathways	Pathways	KEGG (Arabidopsis thaliana (thale cress))	15	1	3358	41	0.169	0.772113	0.265	C00137	C00137
ath00460	Cyanoamino acid metabolism	KEGG pathways	Pathways	KEGG (Arabidopsis thaliana (thale cress))	15	1	3358	41	0.169	0.772113	0.265	C01401	C01401
ath00340	Histidine metabolism	KEGG pathways	Pathways	KEGG (Arabidopsis thaliana (thale cress))	15	1	3358	44	0.18	0.744727	0.265	C00025	C00025
ath00310	Lysine degradation	KEGG pathways	Pathways	KEGG (Arabidopsis thaliana (thale cress))	15	1	3358	47	0.191	0.718967	0.265	C00489	C00489
ath00053	Ascorbate and aldarate metabolism	KEGG pathways	Pathways	KEGG (Arabidopsis thaliana (thale cress))	15	1	3358	47	0.191	0.718967	0.265	C00137	C00137
ath00071	Fatty acid metabolism	KEGG pathways	Pathways	KEGG (Arabidopsis thaliana (thale cress))	15	1	3358	50	0.202	0.694649	0.265	C00489	C00489
ath00100	Steroid biosynthesis	KEGG pathways	Pathways	KEGG (Arabidopsis thaliana (thale cress))	15	1	3358	51	0.206	0.686133	0.265	C00599	C00599
ath00240	Pyrimidine metabolism	KEGG pathways	Pathways	KEGG (Arabidopsis thaliana (thale cress))	15	1	3358	59	0.234	0.630784	0.287	C00178	C00178
ath01064	Biosynthesis of alkaloids derived from ornithine, lysine and nicotinic acid	KEGG pathways	Pathways	KEGG (Arabidopsis thaliana (thale cress))	15	1	3358	67	0.261	0.583359	0.306	C00025	C00025
ath00970	Aminoacyl-tRNA biosynthesis	KEGG pathways	Pathways	KEGG (Arabidopsis thaliana (thale cress))	15	1	3358	75	0.288	0.540608	0.314	C00025	C00025
ath00130	Ubiquinone and other terpenoid-quinone biosynthesis	KEGG pathways	Pathways	KEGG (Arabidopsis thaliana (thale cress))	15	1	3358	76	0.291	0.536107	0.314	C00156	C00156
ath00230	Purine metabolism	KEGG pathways	Pathways	KEGG (Arabidopsis thaliana (thale cress))	15	1	3358	92	0.341	0.467246	0.354	C00212	C00212
ath00860	Porphyrin and chlorophyll metabolism	KEGG pathways	Pathways	KEGG (Arabidopsis thaliana (thale cress))	15	1	3358	126	0.437	0.359519	0.437	C00025	C00025
